# Supplementary material
Source: Springer Nature journal article supplement (https://www.springermedizin.de/resource/supplementary/12879_2011_1746_MOESM6_ESM.pdf/9443326)

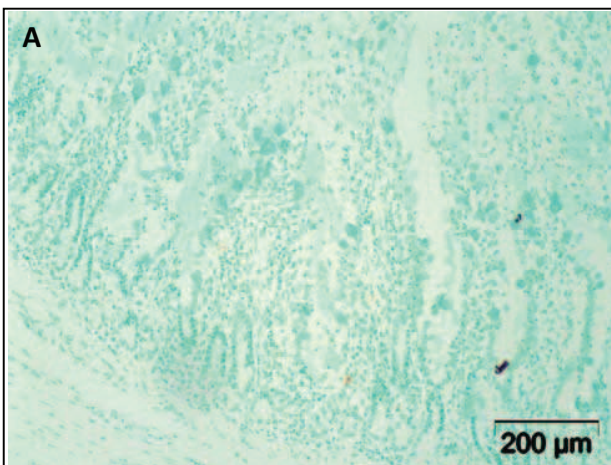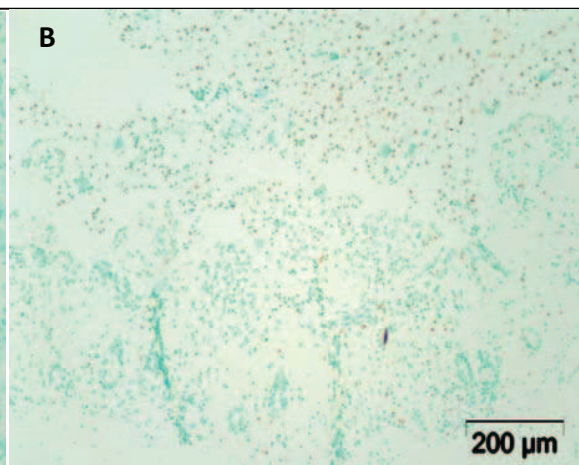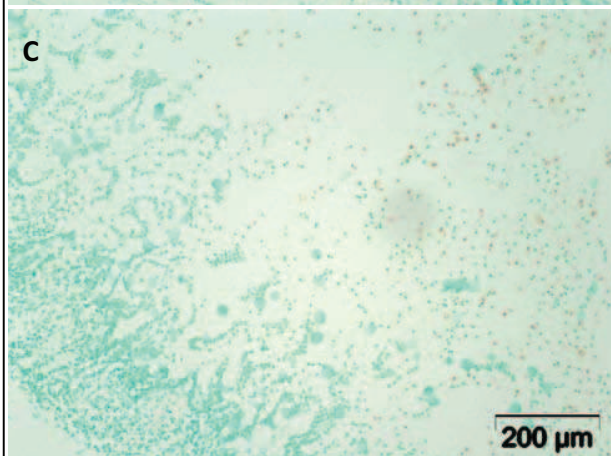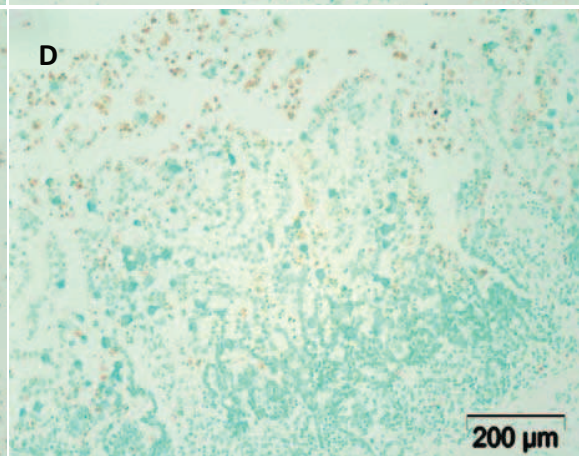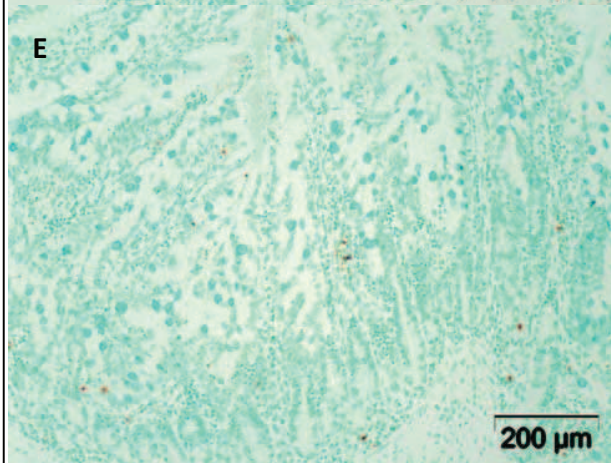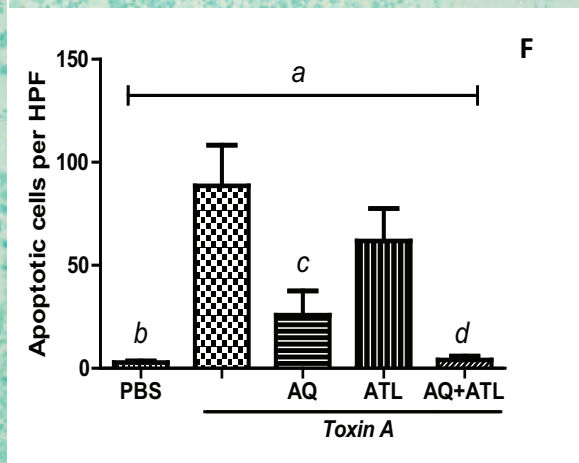

Supplement: MOESM6 [file 9443326]
